# Supplementary material
Source: PubMed Central journal article supplement (PMC1815282)

kDa                      BluB<sup>WT</sup>      BluB<sup>R22E</sup>

250

150

100

75

50

37

25

20

15

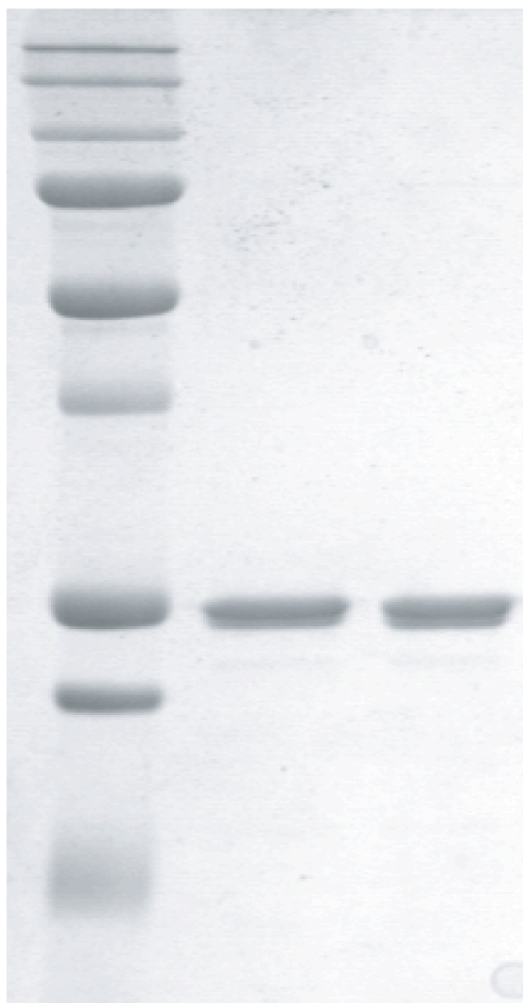

Supplement: pnas_0609270104_2.pdf [file pnas_0609270104_2.pdf]

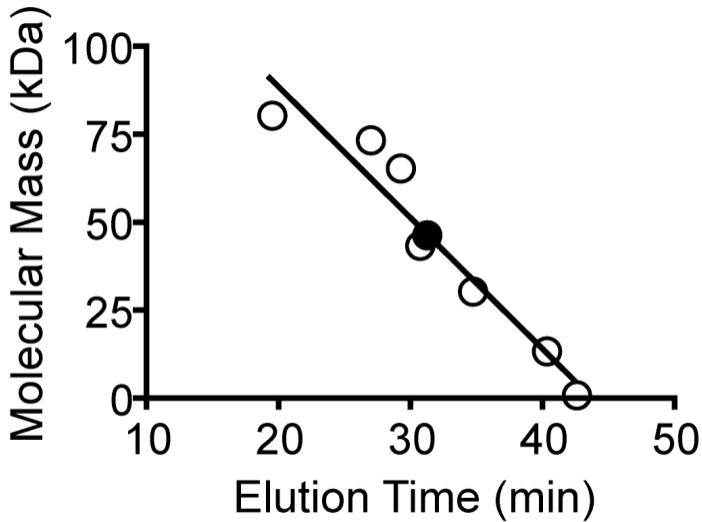

Supplement: pnas_0609270104_3.pdf [file pnas_0609270104_3.pdf]

mAU

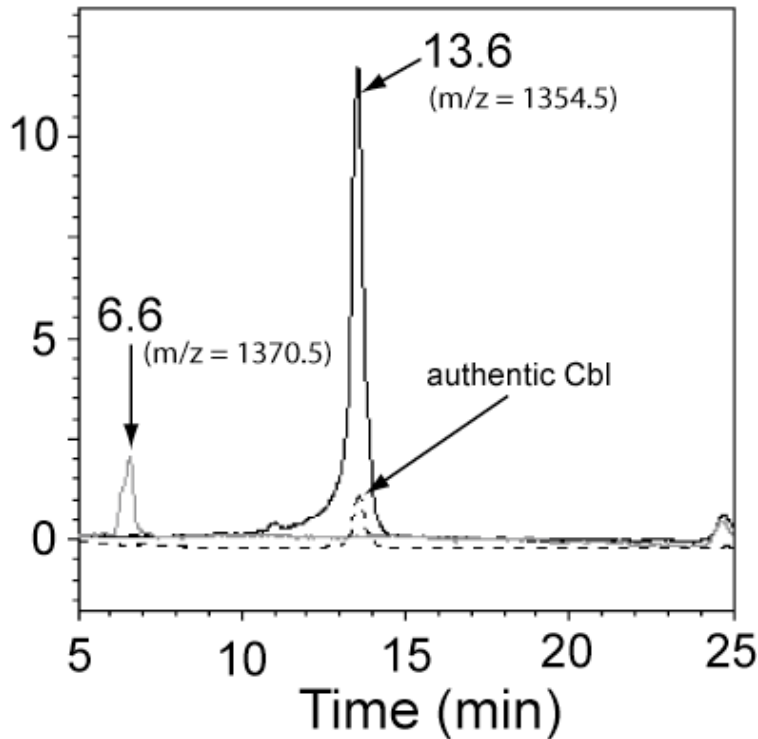

Supplement: pnas_0609270104_4.pdf [file pnas_0609270104_4.pdf]
